# Supplementary material for: Removing Aged Polymer Coatings from Porous Stone Surfaces Using the Gel Cleaning Method
Source: MDPI journal article supplement (doi:10.3390/coatings14040482), 2024-04-14
Supplement: s1 [file s1]

Supplementary

# Removing Aged Polymer Coatings from Porous Stone Surfaces by Gel Cleaning Method

Maduka L. Weththimuni <sup>1,2,\*</sup>, Giacomo Fiocco <sup>3,4</sup>, Alessandro Girella <sup>1,2</sup>, Barbara Vigani <sup>5</sup>, Donatella Sacchi <sup>1</sup>, Silvia Rossi <sup>5</sup> and Maurizio Licchelli <sup>1,2,\*</sup>

<sup>1</sup> Department of Chemistry, University of Pavia, Via Taramelli 12, 27100 Pavia, Italy; alessandro.girella@unipv.it (A.G.); donatella.sacchi@unipv.it (D.S.)

<sup>2</sup> Research Centre for Cultural Heritage (CISRIc), University of Pavia, Via Ferrata 1, 27100 Pavia, Italy

<sup>3</sup> Arvedi Laboratory of Non-Invasive Diagnostics, Research Centre for Cultural Heritage (CISRIc), University of Pavia, via Bell'Aspa, 26100 Cremona, Italy; giacomo.fiocco@unipv.it

<sup>4</sup> Department of Musicology and Cultural Heritage, University of Pavia, Corso Garibaldi, 178, 26100 Cremona, Italy

<sup>5</sup> Department of Drug Sciences, University of Pavia, Via Taramelli 14, 27100 Pavia, Italy; barbara.vigani@unipv.it (B.V.); silvia.rossi@unipv.it (S.R.)

\* Correspondence: madukalankani.weththimuni@unipv.it (M.L.W.); maurizio.licchelli@unipv.it (M.L.)

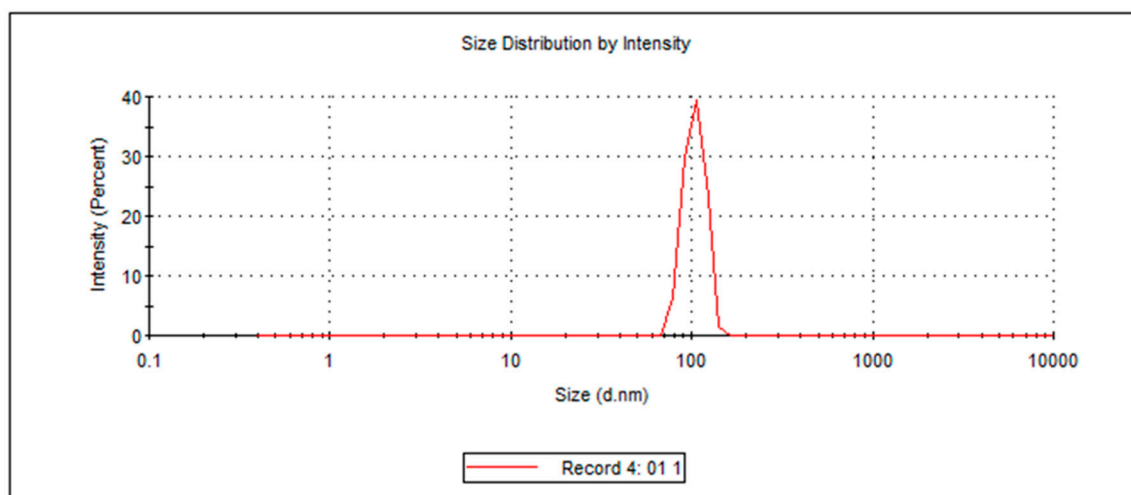

**Figure S1.** Dynamic light scattering (DLS) analysis of prepared NSE.

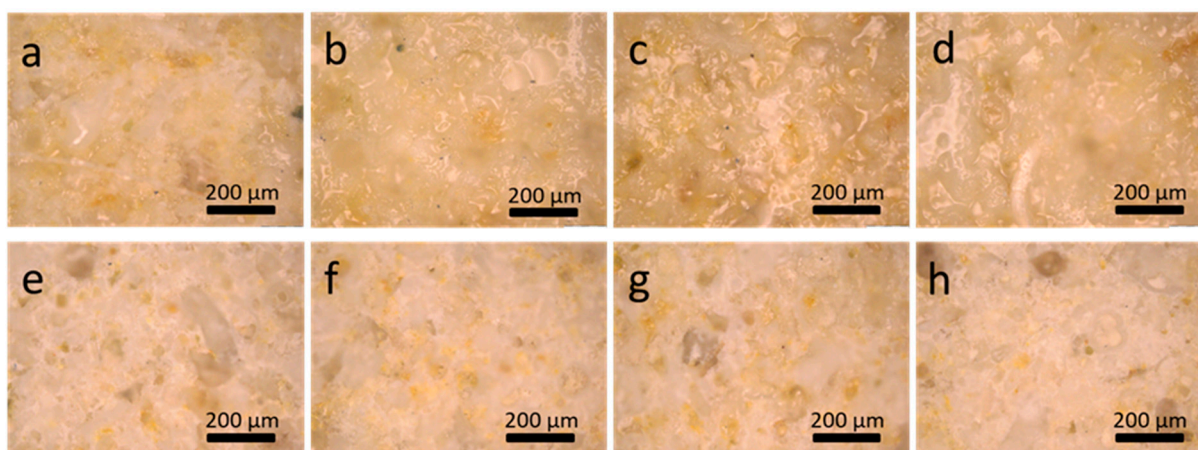

**Figure S2.** Optical microscope images of unaged and aged LS after polymer removal using emulsion-loaded hydrogels: (a) unaged LSPB; (b) 12d LSPB; (c) 25d LSPB; (d) 35d LSPB using EcoSurf/H<sub>2</sub>O; (e) unaged LSPB; (f) 12d LSPB; (g) 25d LSPB; (h) 35d LSPB using NSE.

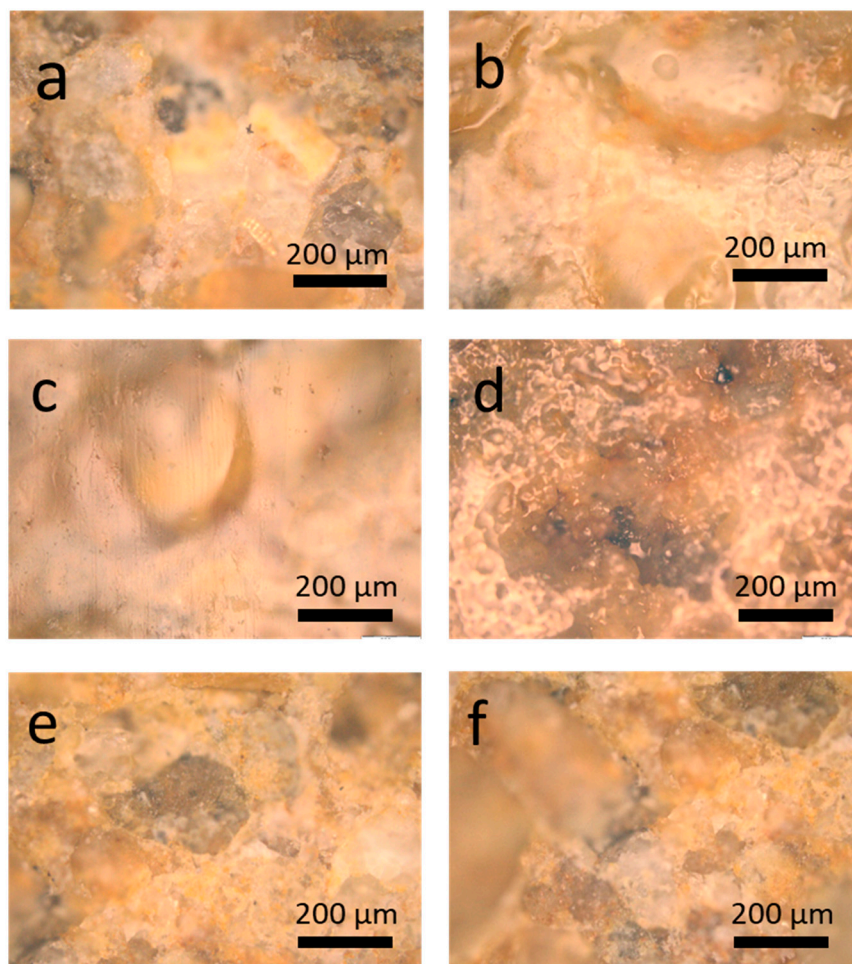

**Figure S3.** Optical microscope images of AS: (a) original/ natural AS; (b) coated ASPB before cleaning; (c) unaged ASPB; and (d) 35d ASPB cleaned using EcoSurf/H<sub>2</sub>O; (e) unaged ASPB; (f) 35d ASPB cleaned using NSE.

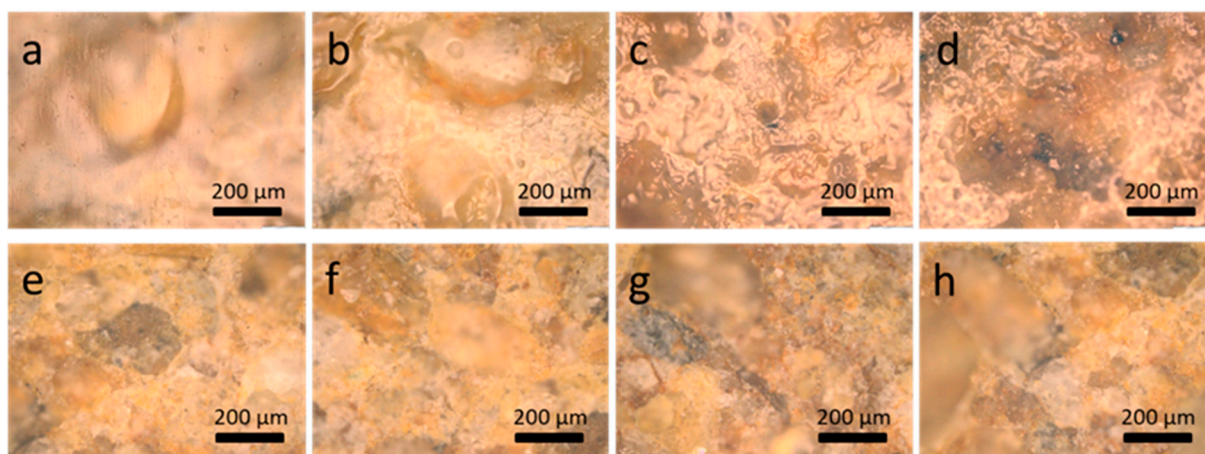

**Figure S4.** Optical microscope images of unaged and aged AS after polymer removal using emulsion-loaded hydrogels: (a) unaged ASPB; (b) 12d ASPB; (c) 25d ASPB; (d) 35d ASPB using EcoSurf/H<sub>2</sub>O; (e) unaged ASPB; (f) 12d ASPB; (g) 25d ASPB; (h) 35d ASPB using NSE.

**Table S1.** The results of the EDS semi-quantitative analysis of both LS and AS (carbon/calcium Wt%): uncoated, coated, and after cleaning with two different emulsions (unaged and 35 day aged).

| Stones | Carbon/Calcium (Wt%) |           |           |                                  |           |             |            |
|--------|----------------------|-----------|-----------|----------------------------------|-----------|-------------|------------|
|        | Uncoated             | Coated    |           | Cleaned—EcoSurf/H <sub>2</sub> O |           | Cleaned—NSE |            |
|        |                      | Unaged    | 35d aged  | Unaged                           | 35d aged  | Unaged      | 35d aged   |
| LS     | 0.30±0.02            | 26.9 ±0.6 | 2.7 ±0.8  | 13.2 ±1.2                        | 2.1 ±0.5  | 0.20 ±0.01  | 0.20 ±0.03 |
| AS     | 0.30±0.06            | 45.4 ±0.5 | 44.5 ±1.7 | 36.4 ±0.4                        | 34.5 ±0.7 | 0.40 ±0.01  | 0.30 ±0.02 |

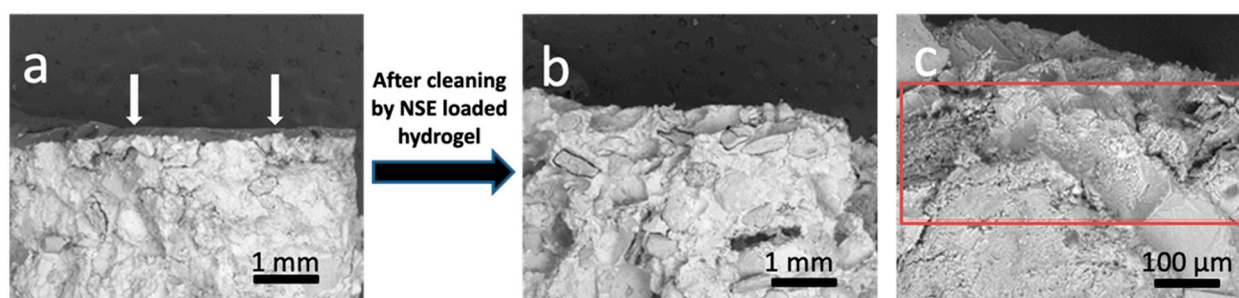**Figure S5.** SEM images of the cross-sections of 35d aged AS before and after polymer removing using NSE-loaded hydrogels: (a) before cleaning ASPB; (b) after cleaning ASPB; (c) at a higher magnification of (b).**Table S2.** Chromatic coordinates of coated (Paraloid B-72) stone specimens after being exposed to 35 days of ageing cycles and after being removed by hydrogels loaded with two different emulsions (EcoSurf/H<sub>2</sub>O and NSE): variations refer to the uncoated/natural stone surfaces.

| Samples | Coated 35d-aged |            |            | Cleaned-EcoSurf/H <sub>2</sub> O |            |            | Cleaned-NSE |             |            |
|---------|-----------------|------------|------------|----------------------------------|------------|------------|-------------|-------------|------------|
|         | ΔL*             | Δa*        | Δb*        | ΔL*                              | Δa*        | Δb*        | ΔL*         | Δa*         | Δb*        |
| LSPB    | -6.63±0.44      | 1.80 ±0.52 | 8.22 ±0.26 | -6.01 ±2.33                      | 1.21 ±0.44 | 6.70 ±0.18 | 0.75 ±0.31  | 0.71 ±0.56  | 0.21 ±0.10 |
| ASPB    | -12.53 ±1.37    | 2.61 ±0.63 | 4.20 ±1.44 | -11.21 ±0.40                     | 2.88 ±1.32 | 2.06 ±0.11 | 2.84 ±0.35  | -1.46 ±0.20 | 0.26 ±0.10 |



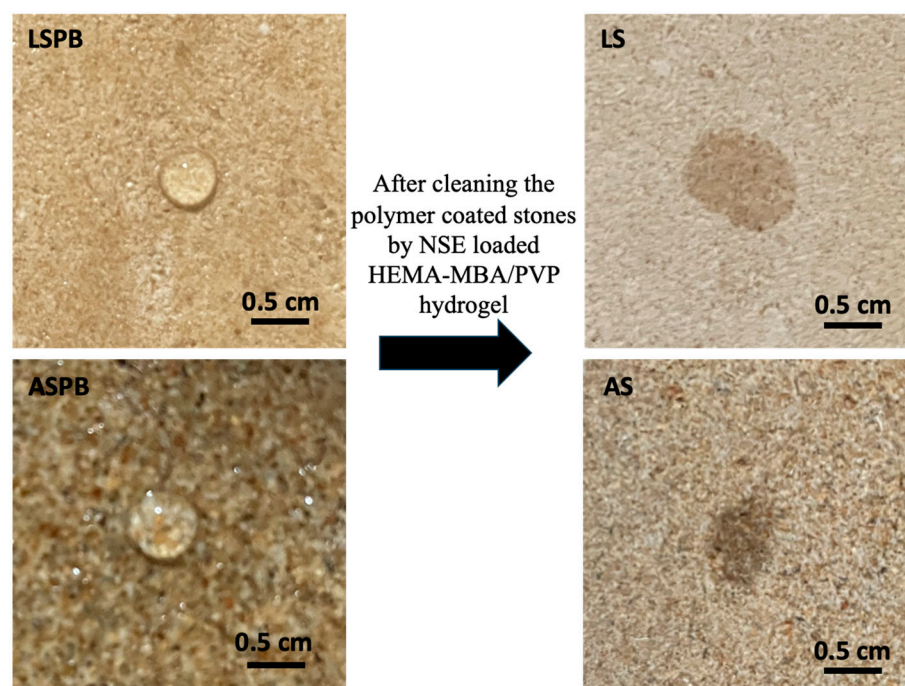

**Figure S6.** Deposition of water droplets on coated stone specimens (LSPB and ASPB) and on the same specimens after cleaning using NSE-loaded hydrogels.

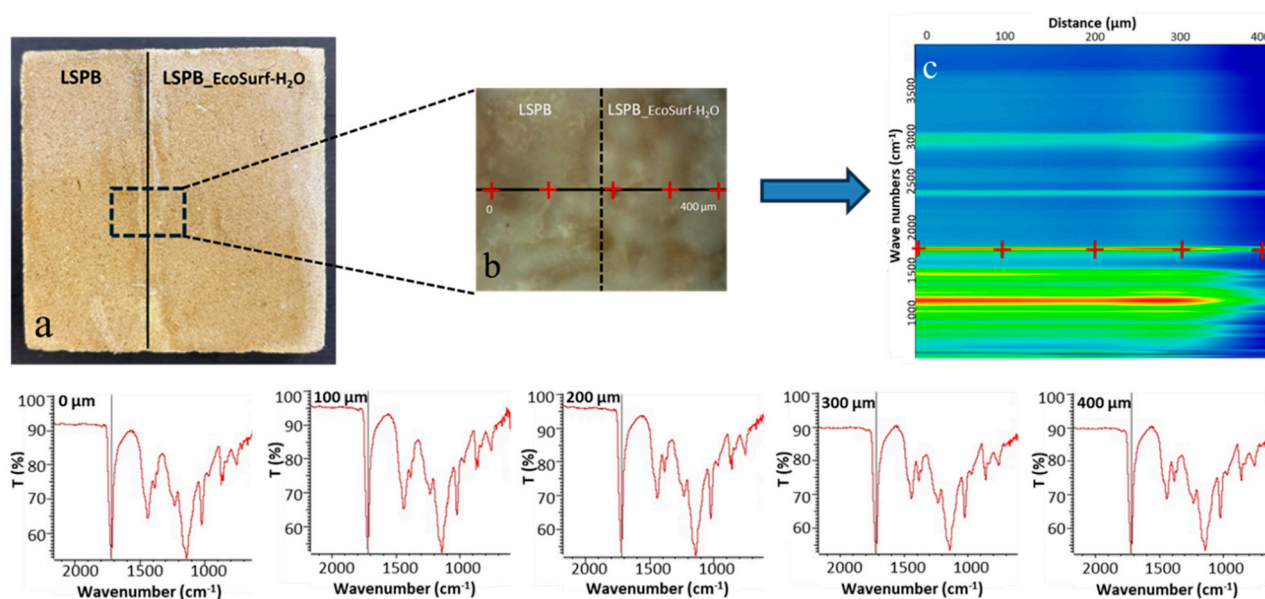

**Figure S7.** Micro-FTIR (ATR mode) mapping analysis performed on 35d coated LS surface before and after applying EcoSurf/H<sub>2</sub>O-loaded hydrogels. Upper side from the left: (a) the examined specimen with a vertical bar separating the coated surface on the left from the cleaned one on the right; (b) the examined area with the considered points and their distances; (c) the resulting false-color μ-FTIR map. Lower side: FTIR spectra taken at the different points in the examined area (from 0 to 400 μm distance); vertical bar indicates the position of the carbonyl stretching peak characteristic of the polyacrylate coating.
